# Supplementary material for: Effects of unmodified and amine-functionalized polystyrene nanoplastics on nitrogen removal by Pseudomonas stutzeri: strain characteristics, extracellular polymers, and transcriptomics
Source: Royal Society of Chemistry journal article supplement (doi:10.1039/d4en00983e), 2025-01-01
Supplement: d4en00983e1.pdf [file d4en00983e1.pdf]

## Supplementary Material

**Exploring on effects of unmodified and amine-functionalized polystyrene nanoplastics on nitrogen removal by *Pseudomonas stutzeri*: From strain characteristics, extracellular polymers to transcriptomics**

Rui Yang <sup>a</sup>, Jianwei Qu <sup>a</sup>, Hanxiang Li <sup>b</sup>, Weile Meng <sup>a</sup>, Xiaowei Xu <sup>a</sup>, Jinsong Guo <sup>a</sup>,  
Fang Fang <sup>a, \*</sup>

<sup>a</sup> Key Laboratory of the Three Gorges Reservoir Region's Eco-Environment, Ministry of Education, Chongqing University, Chongqing 400045, China

<sup>b</sup> Jiangsu Provincial Key Laboratory of Environmental Science and Engineering, Suzhou University of Science and Technology, Suzhou, 215009, China

**NUMBER OF PAGES: 13**

**NUMBER OF TEXTS: 3**

**NUMBER OF TABLES: 2**

**NUMBER OF FIGURES: 5**

**Text S1.** Preparation of PS NPs.

**Text S2.** Strain rejuvenation.

**Text S3.** Compositions of mediums.

**Table. S1** Characteristics of PS NPs and PS-NH<sub>2</sub> NPs.

**Table. S2** C, O, N and functional group composition in the EPS of *P. stutzeri*.

**Fig. S1** FTIR spectra of PS NPs and PS-NH<sub>2</sub> NPs.

**Fig. S2** SEM image of PS NPs (a) and PS-NH<sub>2</sub> NPs (b).

**Fig. S3** SEM images of *P. stutzeri* under exposure to different concentrations (0, 1, 10, 20, 50, and 100 mg/L) of PS NPs (a–f) and PS-NH<sub>2</sub> NPs (g–l).

**Fig. S4** EPS content and composition of *P. stutzeri* under the exposure to PS NPs and PS-NH<sub>2</sub> NPs.

**Fig. S5** Infrared spectra of EPS in *P. stutzeri* under the exposure to PS NPs and PS-NH<sub>2</sub>.

**References**

**Text S1.** Preparation of PS NPs.

PS NPs were synthesized by emulsion polymerization<sup>1,2</sup>. Specific operations were as follows: 0.08 g of  $C_{12}H_{25}NaSO_4$ , 0.11 g of  $NaHCO_3$ , 125 mL of deionized water, and 6 mL of purified styrene were added into a 250 mL three-necked flask. Then the mixture was thoroughly blended and assembled onto the reaction apparatus.  $N_2$  was continuously energized, the stirring speed was controlled at 300 r/min, and the water bath heating was started. Start timing when the water bath temperature reached  $75^\circ C$  and at the 30th minute, 20 mL of 5.5 g/L aqueous ammonium persulfate solution was added, and the reaction was continuous for 5 h. The flask was rapidly cooled after the reaction. The cooled emulsion was transferred to a dialysis bag for dialysis for more than 48 h to remove the residual reactants. The dialyzed nanoplastic emulsion was stored at  $2-8^\circ C$ .

**Text S2. Strain rejuvenation**

*Pseudomonas stutzeri* (*P. stutzeri*) was inoculated into tryptone soy agar (TSA) medium and placed in a constant temperature oscillation incubator at 150 rpm, 28°C for 24 h. Then the bacterial solution was mixed with an equal volume of 50% (v/v) sterile glycerol, and partitioned into 1.5 mL sterile freezing tubes to make glycerol bacterium, and the preserved glycerol bacterium was inoculated into TSA medium at 1% (v/v), placed in a constant temperature shaking incubator at 150 rpm and 28°C for 24 h to facilitate revitalization. and then centrifuged at 4000 rpm and 4°C for 10 min to collect the precipitate of *P. stutzeri*. *P. stutzeri* was resuspended with 0.01 M neutral phosphate buffered solution (PBS) and the cell density OD<sub>600</sub> of the suspension was adjusted to approximately 1.0. The resulting suspension was used for subsequent inoculation.

**Text S3.** Compositions of mediums.

**Tryptone Soy Agar (TSA) Medium:** The TSA medium per litre used for the experiment was formulated as 15.0 g tryptone, 5.0 g soy peptone and 5.0 g NaCl, and the pH was adjusted to 7.0-7.5 with 1 mol/L HCl or NaOH solution. Then the medium was fixed in purified water and dispensed into conical flasks, autoclaved at 121°C for 30 min. The solid medium was prepared by adding 15.0 g/L agar powder to this formula, and then dispensed into petri dishes after autoclaving.

**Denitrification (DN) medium:** the DN medium per liter used for the experiment was formulated as 0.72 g KNO<sub>3</sub>, 3.0 g C<sub>6</sub>H<sub>12</sub>O<sub>6</sub>·H<sub>2</sub>O, 4.78 g Na<sub>2</sub>HPO<sub>4</sub>·12H<sub>2</sub>O, 1.24 g NaH<sub>2</sub>PO<sub>4</sub>·2H<sub>2</sub>O, 4.0 g NaCl and 3 mL of trace element solution. Where the trace elements per liter were formulated as 3.01 g MgSO<sub>4</sub>·7H<sub>2</sub>O, 3.36 g MnSO<sub>4</sub>·H<sub>2</sub>O, 1.12 g H<sub>3</sub>BO<sub>3</sub>, 3.00 g ZnSO<sub>4</sub>·7H<sub>2</sub>O, 0.30 g FeSO<sub>4</sub>·7H<sub>2</sub>O, 0.6 g CaCl<sub>2</sub>.

**Table. S1** Characteristics of PS NPs and PS-NH<sub>2</sub> NPs.

|                        | Partical size<br>(nm) | Zeta potential<br>(mV) | Solid content of emulsion<br>(mg/mL) |
|------------------------|-----------------------|------------------------|--------------------------------------|
| PS NPs                 | 85.2 ± 2.3            | -24.8 ± 3.2            | 27.5                                 |
| PS-NH <sub>2</sub> NPs | 93.2 ± 1.5            | 19.0 ± 0.8             | 25.0                                 |

**Table. S2** C, O, N and functional group composition in the EPS of *P. stutzeri*.

| Groups | Elemental composition (molar ratio to C) |       | C 1s peak functional group relative content (%) |           |           |
|--------|------------------------------------------|-------|-------------------------------------------------|-----------|-----------|
|        | O/C                                      | N/C   | C-(C, H)                                        | C-(O, N)  | C=O/O-C-O |
|        |                                          |       | 284.08 eV                                       | 285.80 eV | 287.67 eV |
| 1      | 0.11                                     | 0.063 | 80.16                                           | 17.91     | 1.94      |
| 2      | 0.38                                     | 0.021 | 77.65                                           | 18.86     | 3.49      |
| 3      | 0.38                                     | 0.049 | 74.67                                           | 22.86     | 2.47      |
| 4      | 0.13                                     | 0.061 | 63.92                                           | 21.34     | 14.74     |
| 5      | 0.14                                     | 0.029 | 68.08                                           | 16.22     | 15.70     |

Note: Subgroups 1-5 represent the control group, PS 10 mg/L, PS 50 mg/L, PS-NH<sub>2</sub> 10 mg/L, PS-NH<sub>2</sub> 50 mg/L, respectively.

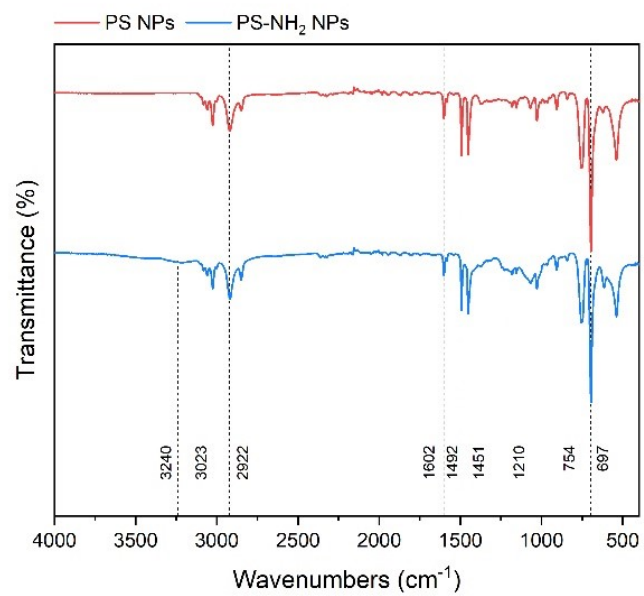

**Fig. S1** FTIR spectra of PS NPs and PS-NH<sub>2</sub> NPs.



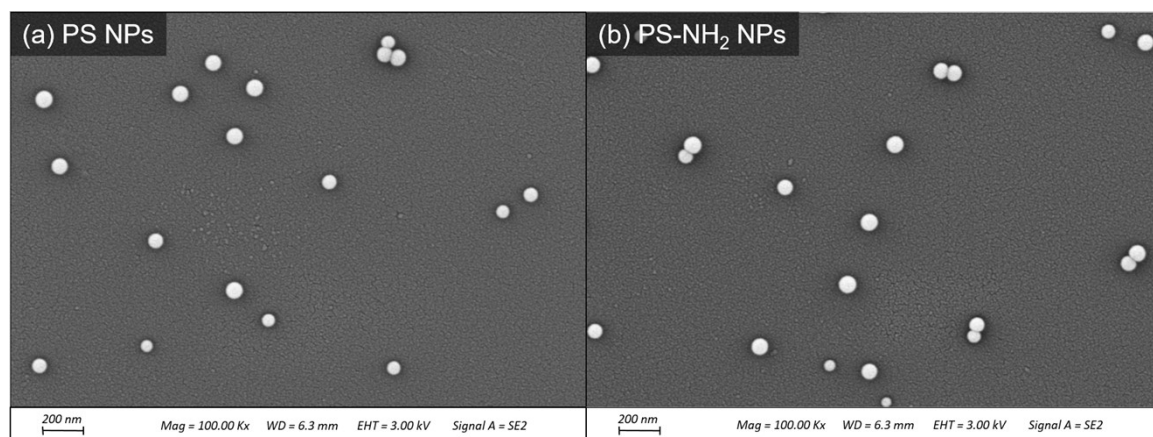

**Fig. S2** SEM image of PS NPs (a) and PS-NH<sub>2</sub> NPs (b).

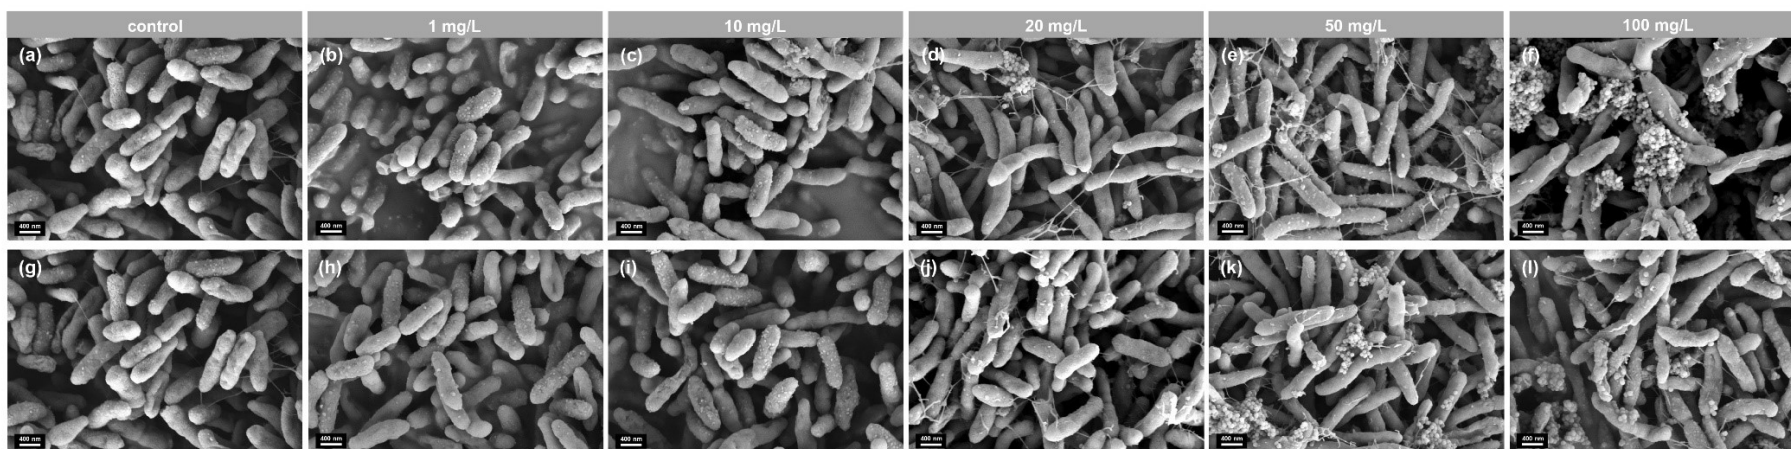

**Fig. S3.** SEM images of *P. stutzeri* under exposure to different concentrations (0, 1, 10, 20, 50, and 100 mg/L) of PS NPs (a–f) and PS-NH<sub>2</sub> NPs (g–l).

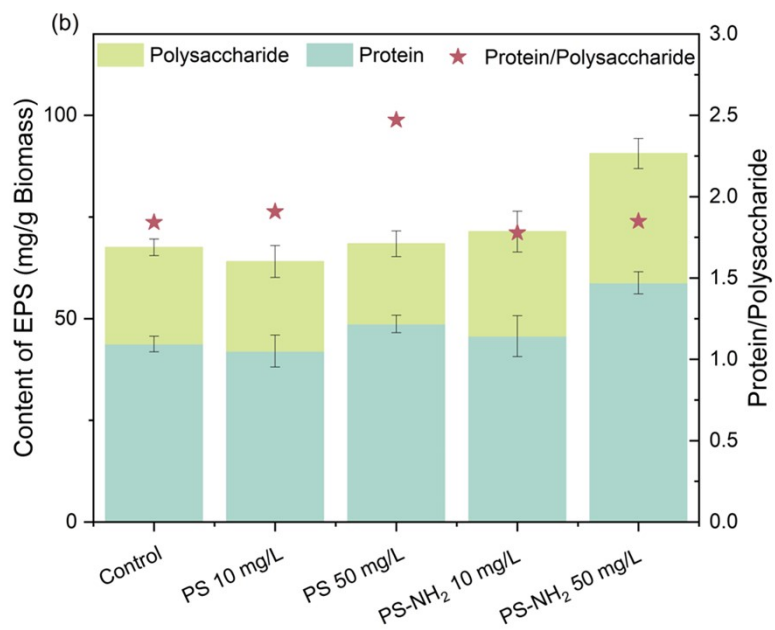

**Fig. S4** EPS content and composition of *P. stutzeri* under the exposure to PS NPs and PS-NH<sub>2</sub> NPs.

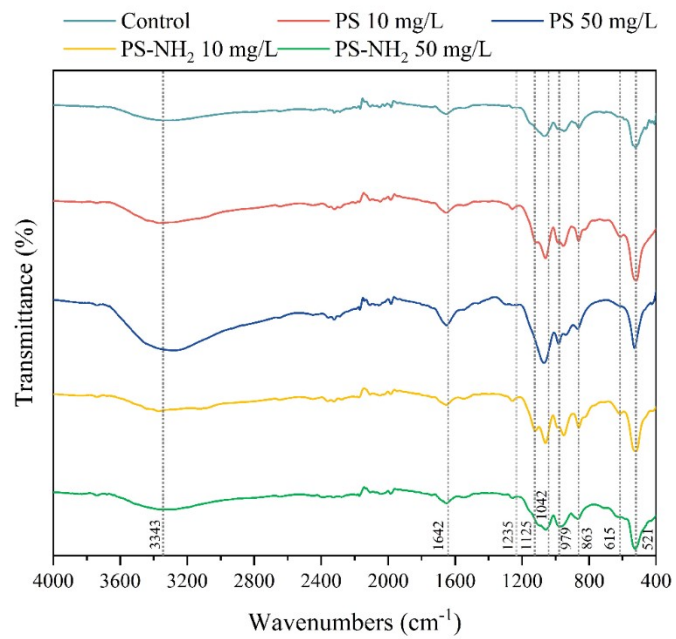

**Fig. S5** Infrared spectra of EPS in *P. stutzeri* under the exposure to PS NPs and PS-NH<sub>2</sub> NPs.

## References

1. L. J. Feng, Y. Shi, X. Y. Li, X. D. Sun, F. Xiao, J. W. Sun, Y. Wang, X. Y. Liu, S. G. Wang and X. Z. Yuan, Behavior of tetracycline and polystyrene nanoparticles in estuaries and their joint toxicity on marine microalgae *Skeletonema costatum* *Environ. Pollut.*, 2020, **263**, 114453.
2. H. X. Li, S. S. Xu, S. Wang, J. X. Yang, P. Yan, Y. P. Chen, J. S. Guo and F. Fang, New insight into the effect of short-term exposure to polystyrene nanoparticles on activated sludge performance, *J. Water Process Eng.*, 2020, **38**, 101559.
